# Supplementary material for: Identification and analysis of MKK and MPK gene families in canola (Brassica napus L.)
Source: PubMed Central journal article supplement (PMC3701561; doi:10.1186/1471-2164-14-392), 2013-06-11
Supplement: 1471-2164-14-392-S4.pdf [file 1471-2164-14-392-S4.pdf]

a

Motif

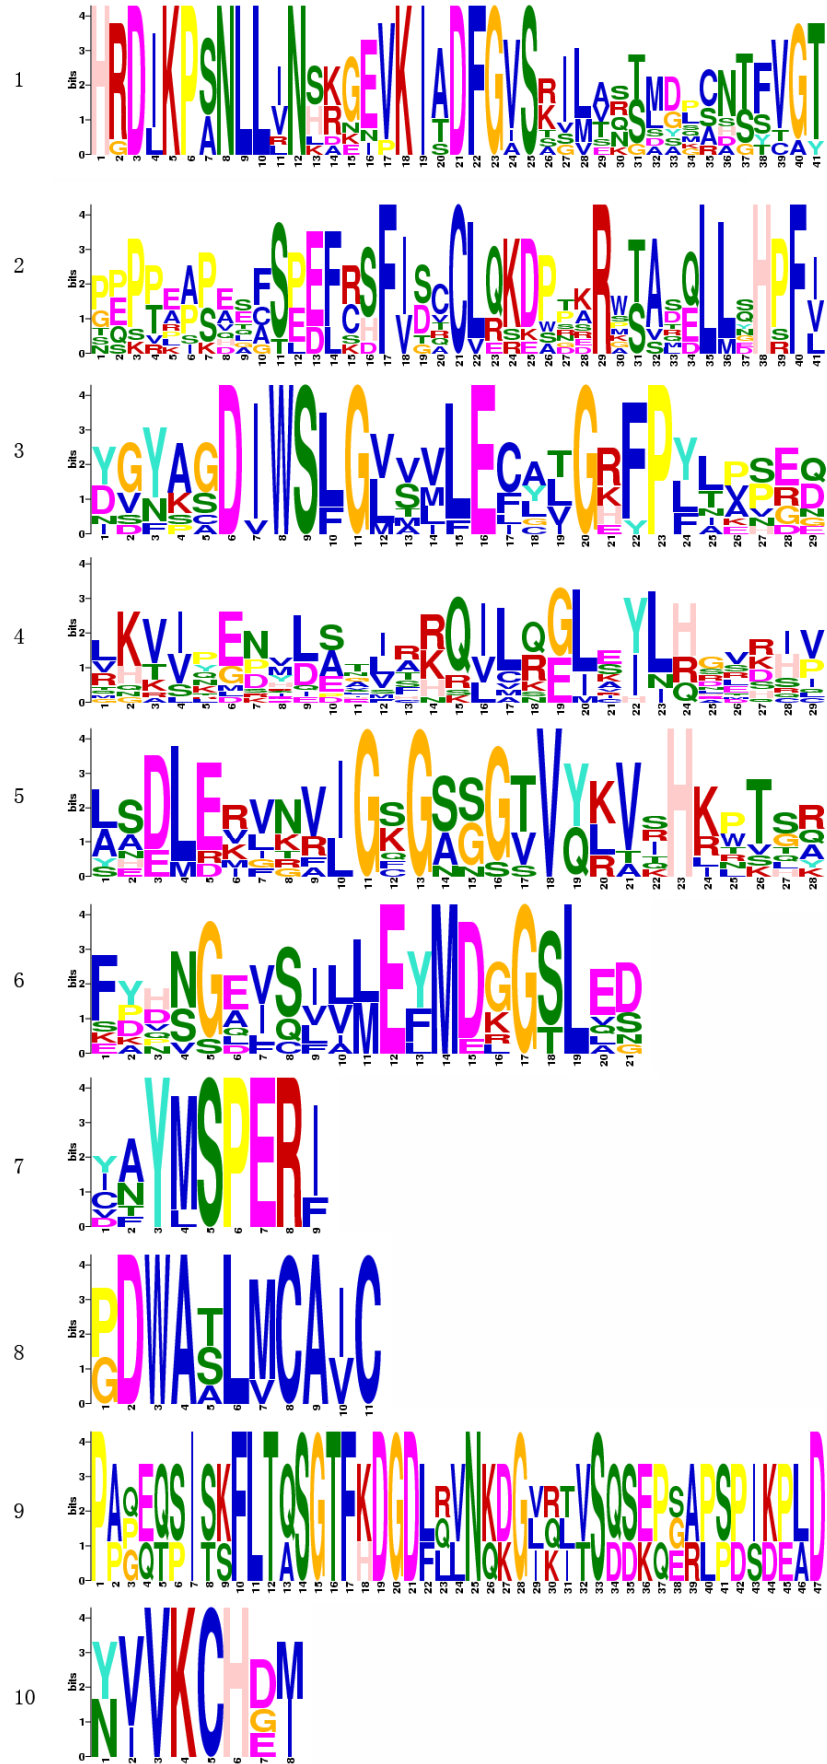

**b**

```
BnaMKK2 1 -----MKKGGFSNNLKLSIPPAGEQSITKFLTQSGTFKDGDLRVNKDGVRIV
BnaMKK1 1 -----MKRGSLSLNP-ISLPPP-EQSISKFLTQSGTFKDGDLQVKNKDIQTV
BnaMKK6 1 -----MKLKSNLKQLNKLSVPAQQTPISSFLTASGTFHDGDFLLNQKGLKLT
BnaMKK4 1 -----MKPVQSAPVKSRRPRRPPDLSLPLPQRDVSLAVPLPLPP-TSG
BnaMKK5 1 -----MAMRRNKRPPDLSLPLPNRNVAVLAVPLPLPPPPSS
BnaMKK9 1 -----MALVRERRQLNLRIRLPLPPISDRRF
BnaMKK3 1 MAALEELKKKLSPIFDAEKGFSSSSSLDPNDSYLLSDGGTVNLLSRSYGVYNFNEGLGK
consensus 1 . . . . .
```

**Motif 5**

```
BnaMKK2 48 SQSEPEALSPIKPADDKILGLSDLDMVKFVIGKGSQGVVQLVQHKWTGQFFALKVIQLNVDE
BnaMKK1 46 SQSEPGAPPIDPLDNQLSLADLEVIKVIKGSQGVVQLVQHKWTGQFFALKVIQLNTEE
BnaMKK6 48 SDDKQSRPDSKELDFEITAEDEIVRVIGKGSQGVVQLVQHKWTGQFFALKVIQMNIE
BnaMKK4 42 GSSSSSSSSSSSSSAAPKNYSDLERGNRIGSGAGGTIVYKVIHLPTSRPFALKVIYGNHEE
BnaMKK5 35 SSALASSAISINISAAKRLSELERVNRIGSGAGGTIVYKVIHLPTSRPFALKVIYGNHDD
BnaMKK9 25 SLPSITTAASSTVLSNSISAADLEKLNVLCCGNSGTIVYKVIHLPTSRPFALKVIYGNHDD
BnaMKK3 61 CTISLVDESESETTYQCASHEMRVFGAIGSGASSVQRAIHIPKRRILALKRIN-IFER
consensus 61 . . . . . * * . . . * . . . . * . . . . * . . . .
```

**Motif 6**

**Motif 4**

```
BnaMKK2 108 ATRKSLAQELKINQSS-QCPYLVTYSQSFYDN--GATSLILEYMDGGSLEDFLKSVKTIP
BnaMKK1 106 STCRALISQELRINLAS-QCPYLVSCYQSFYHN--GLVSIVMFMDGGSLLDLLKQVQVVP
BnaMKK6 108 EIRKQIVQELKINQASSQCPHVVCYHSFYHN--GAFSLVLEYMDRGSLLVDVIRQVKTIL
BnaMKK4 102 NVRRQICREIEILRDV-SHQNVKCHEMFDQ--NGEIQVLEFMDGGSLEN-RHVSNI---
BnaMKK5 95 NVRRQICREIEILRSV-DHPNVKCHDMFDH--NGEVQVLEFMDKGSLEG-RHVSNI---
BnaMKK9 83 ILTRQIMREIEILRRIT-DSPYVVKCHGIFKPKVGEVSIEMFMDGGSLESLRGAVT---
BnaMKK3 120 EKROQLLEIRTLCEAPCHEGLVDFHGFYSPDSGQISIALEYMDGGSLEDFLKSVKTIP
consensus 121 . . . . . * . . . . * . . . . * . . . . * . . . . * . . . .
```

**Motif 4**

**Motif 1**

```
BnaMKK2 165 ESYLSTIFKQVLOGLIYLLHDKHIHRDLKPSNLLVNHKGEVKITDFGVSTVMTNTAGLA
BnaMKK1 163 ENMLAATSKRVLRLGLCYIHDRRIHRDLKPSNLLINHRGEVKIADFGVSKILSSSTSSLA
BnaMKK6 166 EPYLSVVCQVLOGLVYLHNERHVIHRDIKPSNLLVNHKGEVKISDFGVSSASLASSMGQR
BnaMKK4 155 ERDLAHLHQILNGLAYLHG-RHIVHRDIKPSNLLINSDKIADFGVSRILAQTMDPC
BnaMKK5 148 ENELAGLTRQILSGLAYTHR-RHIVHRDIKPSNLLINSANNVKIADFGVSRILAQTMDPC
BnaMKK9 139 EKRLAGFARQILKGLSYLHG-LKIVHRDIKPSNLLINSDKIADFGVSKILVRSLSLSC
BnaMKK3 180 EPVLSVSMFELKLLQGLSYLHGVRHLVHRDIKPSNLLVNLKGEVKITDFGIVSSGLENSMAMC
consensus 181 * * . . . * * * * . . . . * * * * * * * * * * * * * * * * . . . .
```

**Motif 1**

**Motif 7**

**Motif 3**

```
BnaMKK2 225 NTFVGTIYNYMSP---ERI-----VGNKYGNKSDIWSLGLVLECATGKFPYIPPEEETW
BnaMKK1 223 HTFVGTDFYMSPP---ERI-----SGKAYGNKCDIWSLGVVLECATGKFPYTPPENMKGW
BnaMKK6 226 DTFVGTIYNYLSP---ERI-----SGSTYDYSSDIWSLGMVLECAIGRFPYLESEDQONP
BnaMKK4 214 NSVGTIAYMSP---ERINTDLNCRYDGYAGDIWSLGVSVLEFYLGFRFPFVSRQG---
BnaMKK5 207 NSVGTIAYMSP---ERINTDLNHGRYDGYAGDIWSLGVSVLEFYLGFRFPFVSRQG---
BnaMKK9 198 NSVGTICAYMSP---ERFDSSG--GSSDVYAGDIWSFGLMMLLELLVGHFPLPPGQRP--
BnaMKK3 240 ATFVGTIVTYMSPERIR-----NDGYSYPADIWSLGLALFECGTGEFPIANEGP---
consensus 241 . . . * * * . . . . . * * * * * * * * * * * * * * * . . . .
```

**Motif 2**

```
BnaMKK2 277 SSVFELMEAVDQPPPTLPSEFSPELSSSFISTCLQKDPNSRSSARELMEHPFVKKYDNN
BnaMKK1 275 TNMYELVDAIVENPPPAPSHLFSPEFCSFISQCVQKDPDRDRKSAMELLDHRFVNMFFED-
BnaMKK6 278 PSEYELLAIVESPPPAPSDQFSPEFCSFITACLQKDPNPARASSLDLLSHSFIKFKFED-
BnaMKK4 268 -DWASLMCAICMSQPPEAP-AAASPDRHFISCCLOREPGRMTATQLLQHPFIRRAVSQ
BnaMKK5 261 -DWASLMCAICMTQPPEAP-ATASEDRHFISCCLOSDPPKRWSAQQLLQHPFIVKSSGG
BnaMKK9 251 -DWATLMCAVCFGEPPRAP-EGCSEEFRSFVDCCLRKDSTKRWTASQLLGHFPLOEEL--
BnaMKK3 289 ---VNLMLQILLDPSPTPSKQEFSEFCSFIDVCLQKDADARPTADQLLSHPFITKHEK-
consensus 301 . . . * . . . . * . . . . * . . . . * . . . . * . . . . * . . . .
```

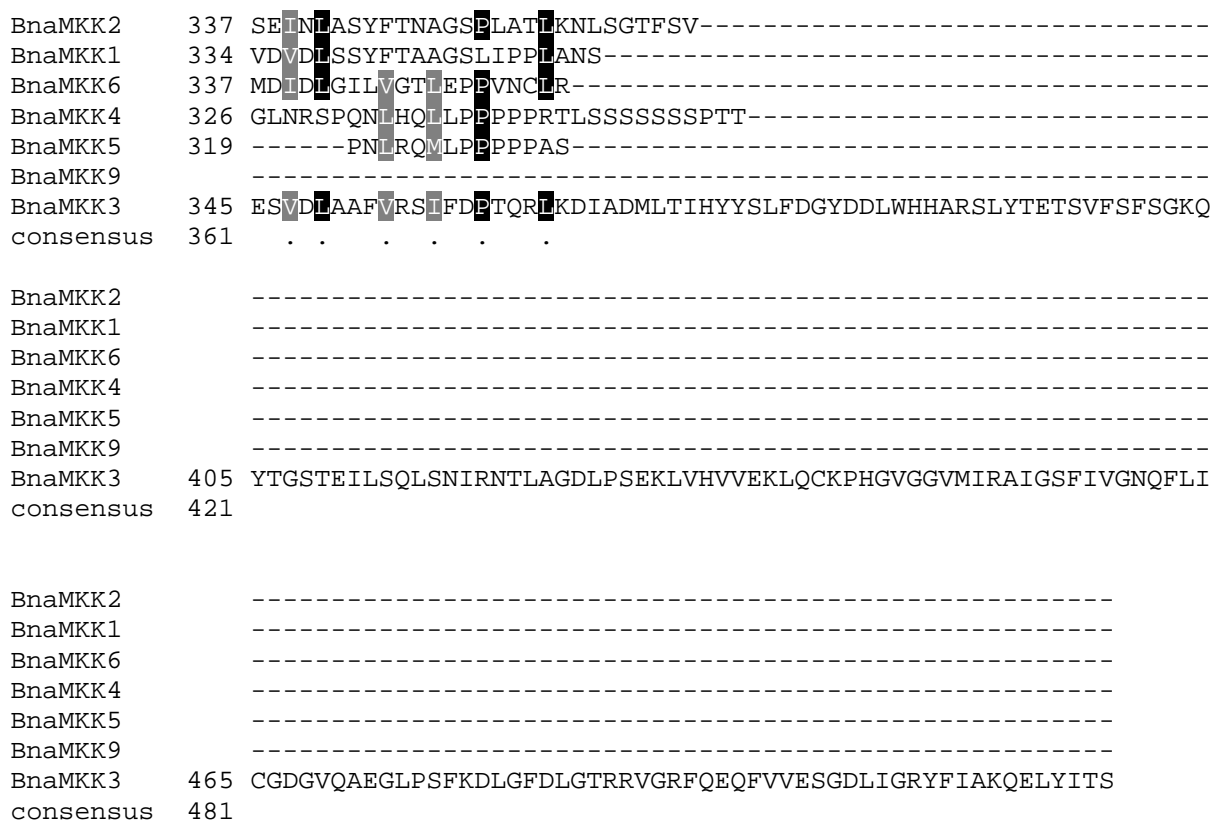

Figure S2. A detailed motif analysis and multiple alignment of canola MKKs.

a, The analysis is from MEME 4.9.0 (Release date: Wed Oct 3 11:07:26 EST 2012).

Stack heights represent conservation at a position, and symbol heights within a stack represent the relative frequency of each residue.

b, Multiple alignment of BnaMKKs with 7 motifs shown as overbars.
