# Supplementary material for: Identification and analysis of MKK and MPK gene families in canola (Brassica napus L.)
Source: PubMed Central journal article supplement (PMC3701561; doi:10.1186/1471-2164-14-392), 2013-06-11
Supplement: 1471-2164-14-392-S6.pdf [file 1471-2164-14-392-S6.pdf]

|           |     |        |       |       |        |          |           |       |        |       |       |       |        |       |      |
|-----------|-----|--------|-------|-------|--------|----------|-----------|-------|--------|-------|-------|-------|--------|-------|------|
|           |     | ▼      |       | ▼     | ▼      | ▼▼▼      | ▼▼▼       | ▼     |        | ▼     | ▼     |       | ▼▼     | ▼▼    |      |
| BnaMPK4   | 80  | FDNII  | DAKRT | LREIK | LLKHM  | DHENVI   | AVKDI     | IRPPL | RENFN  | DVYIV | VELMD | TDLHQ | IIRS   |       |      |
| AtMPK4    | 80  | FDNII  | DAKRT | LREIK | LLKHM  | DHENVI   | AVKDI     | IKPPQ | RENFN  | DVYIV | VELMD | TDLHQ | IIRS   |       |      |
| AtMPK11   | 77  | FGNII  | DAKRT | LREIK | LLKHM  | DHENV    | IAITD     | IRPPQ | PDNFN  | DVYIV | VELMD | TDLHH | IIRS   |       |      |
| AtMPK12   | 78  | FDNII  | DAKRT | LREIK | LLRHM  | DHENVI   | TIKDI     | VRPPQ | RDFNF  | DVYIV | VELMD | TDLQR | ILRS   |       |      |
| BdMPK11   | 91  | FDNQI  | DAKRT | LREIK | LLRHM  | NHENVI   | SIKDI     | IRPPR | RENFN  | DVYIV | VELMD | TDLHH | LLRS   |       |      |
| OsMPK4    | 80  | FDNHI  | DAKRT | LREIK | LLRHM  | DHENI    | IAIKD     | IRPPR | RDNFN  | DVYIV | VELMD | TDLHQ | IIRS   |       |      |
| BnaMPK5   | 77  | FDNKV  | DAKRT | LREIK | LLRHLE | HEENV    | VIKDI     | IRPPK | KETFT  | DVYIV | VELMD | TDLHQ | IIRS   |       |      |
| AtMPK5    | 79  | FDNKV  | DAKRT | LREIK | LLRHLE | HEENV    | VVIKDI    | IRPPK | KEDFV  | DVYIV | VELMD | TDLHQ | IIRS   |       |      |
| AtMPK13   | 70  | FDNRV  | DAKRT | LREIK | LLSHM  | DHENV    | IKIKDI    | TELPE | KERFE  | DVYIV | VELMD | TDLHQ | IIRS   |       |      |
| BnaMPK3   | 75  | FDNHMD | AKRT  | LREIK | LLRHL  | DHENI    | IAIRD     | VVFP  | PLRQFS | SDVYI | ATELM | TDLHQ | IIRS   |       |      |
| AtMPK3    | 75  | FDNHMD | AKRT  | LREIK | LLRHL  | DHENI    | IAIRD     | VVFP  | PLRQFS | SDVYI | ATELM | TDLHQ | IIRS   |       |      |
| OsMPK3    | 73  | FNNDM  | AKRT  | LREIK | LLRHL  | DHENI    | IGIRD     | VIPPI | PQAFN  | DVYI  | ATELM | TDLHH | IIRS   |       |      |
| BdMPK3    | 73  | FDNNM  | AKRT  | LREIK | LLRHL  | DHENI    | VGLRD     | VIPPA | IPQSF  | DVYI  | ATELM | TDLHH | IIRS   |       |      |
| BnaMPK6   | 97  | FDNKI  | DAKRT | LREIK | LLRHM  | DHENI    | VAIRD     | IIPPL | RRTAF  | NVYI  | ATELM | TDLHQ | IIRS   |       |      |
| AtMPK6    | 100 | FDNKI  | DAKRT | LREIK | LLRHM  | DHENI    | VAIRD     | IIPPL | RRTAF  | NVYI  | ATELM | TDLHQ | IIRS   |       |      |
| OsMPK6    | 104 | FDNKI  | DAKRT | LREIK | LLRHM  | DHENI    | VAIRD     | IIPPO | RNSFN  | DVYI  | ATELM | TDLHQ | IIRS   |       |      |
| BdMPK6    | 97  | FDNKI  | DAKRT | LREIK | LLRHM  | DHENI    | VAIRD     | IIPPA | QRNSF  | NVYI  | ATELM | TDLHQ | IIRS   |       |      |
| AtMPK10   | 98  | FDNTI  | EAKRT | LREIK | LLRHF  | DHENI    | VAIRD     | VILPP | QRDSF  | DVYIV | NELME | F     | DLYRT  | LKS   |      |
| OtMPK     | 138 | FENVV  | DAKRT | LREIK | LLRHL  | RHENVI   | DIIDCV    | RPEAM | DAFED  | VYLYL | M     | DLT   | DLY    | QIIRS |      |
| BnaMPK1   | 69  | YENRI  | DALRT | LRELK | LLRHL  | RHENVI   | ALKDV     | MMPI  | HKRSF  | KDVYL | V     | VELMD | TDLHQ  | IIRS  |      |
| AtMPK1    | 69  | YENRI  | DALRT | LRELK | LLRHL  | RHENVI   | ALKDV     | MMPI  | HKMSF  | KDVYL | V     | VELMD | TDLHQ  | IIRS  |      |
| BnaMPK2   | 69  | FQNR   | DALRT | LRELK | LLRHL  | RHDNVI   | ALKDV     | MMAN  | HKRTF  | KDVYL | V     | VELMD | TDLHQ  | IIRS  |      |
| AtMPK2    | 69  | FENRI  | DALRT | LRELK | LLRHL  | RHENV    | ALKDV     | MMAN  | HKRSF  | KDVYL | V     | VELMD | TDLHQ  | IIRS  |      |
| OsMPK2    | 69  | FDNRV  | DALRT | LRELK | LLRHL  | RHENVI   | ALKD      | IMPV  | HRRSF  | KDVYL | V     | VELMD | TDLHQ  | IIRS  |      |
| OsMPK14   | 69  | FDNRV  | DALRT | LRELK | LLRHL  | RHENVI   | ALKD      | IMPV  | HRRSF  | KDVYL | V     | VELMD | TDLHQ  | IIRS  |      |
| BdMPK14   | 69  | FDNRV  | DALRT | LRELK | LLRHL  | RHENVI   | SLKD      | IMPV  | QRRSF  | KDVYL | V     | VELMD | TDLHQ  | IIRS  |      |
| OsMPK7    | 69  | FDNRV  | DALRT | LRELK | LLRHL  | RHENVI   | ALKD      | IMPV  | HRRSF  | KDVYL | V     | VELMD | TDLHQ  | IIRS  |      |
| BdMPK7    | 113 | FDNRV  | DALRT | LRELK | LLRHL  | RHENVI   | ALKD      | IMPV  | HRRSF  | KDVYL | V     | SELMD | TDLHQ  | IIRS  |      |
| AtMPK7    | 69  | FENRV  | DALRT | LRELK | LLRHL  | RHENVI   | ALKDV     | MLP   | ANRSS  | F     | KDVYL | V     | VELMD  | TDLHQ | IIRS |
| AtMPK14   | 69  | FENRI  | DALRT | LRELK | LLRHL  | RHENVI   | SLKD      | VMLP  | THRYS  | F     | RDVYL | V     | VELMD  | SDLNQ | IIRS |
| AtMPK19   | 62  | FEHVS  | DALRI | LREV  | KLLRLL | LRHPD    | IVEIK     | SIMLP | PSKRE  | F     | KDIYV | V     | FELMES | DLHQV | VIKA |
| BnaMPK19  | 62  | FEHIS  | DALRI | LREV  | KLLRLL | LRHPD    | IVEIK     | SIMLP | PSKRE  | F     | KDIYV | V     | FELMES | DLHQV | VIKA |
| AtMPK18   | 62  | FEHIS  | DALRI | LREV  | KLLRLL | LRHPD    | IVEIK     | SIMLP | PSKRE  | F     | KDIYV | V     | FELMES | DLHQV | VIKA |
| BnaMPK20  | 73  | FEHIS  | DAARI | LREIK | LLRLL  | LRHPD    | IVEIK     | HIMLP | PSRRE  | F     | KDIYV | V     | FELMES | DLHQV | VIKA |
| AtMPK20   | 72  | FEHIS  | DAARI | LREIK | LLRLL  | LRHPD    | IVEIK     | HIMLP | PSRRE  | F     | KDIYV | V     | FELMES | DLHQV | VIKA |
| OsMPK20   | 72  | FEHIS  | DAARI | LREIK | LLRLL  | LRHPD    | IVEIK     | HIMLP | PSRRD  | F     | KDIYV | V     | FELMES | DLHQV | VIKA |
| AtMPK8    | 141 | FEHVS  | DATRI | LREIK | LLRLL  | LRHPD    | VVEIK     | HIMLP | PSRRE  | F     | FRDIY | V     | FELMES | DLHQV | VIKA |
| BnaMPK8   | 132 | FEHVS  | DATRI | LREIK | LLRLL  | LRHPD    | VVEIK     | HIMLP | PSRRE  | F     | FRDIY | V     | FELMES | DLHQV | VIKA |
| BnaMPK9   | 60  | FEHVS  | DATRI | LREIK | LLRLL  | LRHPD    | IVEIK     | HVMLP | PSRRE  | F     | FRDIY | V     | FELMES | DLHQV | VIKA |
| AtMPK9    | 60  | FEHVS  | DATRI | LREIK | LLRLL  | LRHPD    | IVEIK     | HVMLP | PSRRE  | F     | FRDIY | V     | FELMES | DLHQV | VIKA |
| OsMPK17   | 124 | FEHVS  | DATRI | LREIK | LLRLL  | LRHPD    | IVEIK     | HIMLP | PSRRE  | F     | QDIYV | V     | FELMES | DLHQV | IRA  |
| BdMPK17   | 124 | FEHVS  | DATRI | LREIK | LLRLL  | LRHPD    | VVEIK     | HIMLP | PSRRE  | F     | QDIYV | V     | FELMES | DLHQV | IRA  |
| BnaMPK16  | 50  | FEHVS  | DATRI | LREIK | LLRLL  | LRHPD    | IVEIK     | HILLP | PSRRE  | F     | FRDIY | V     | FELMES | DLHQV | VIKA |
| AtMPK16   | 62  | FEHVS  | DATRI | LREIK | LLRLL  | LRHPD    | IVEIK     | HILLP | PSRRE  | F     | FRDIY | V     | FELMES | DLHQV | VIKA |
| OsMPK16   | 50  | FEHVS  | DATRI | LREIK | LLRLL  | LRHPD    | IVEIK     | HILLP | PSRRE  | F     | KDIYV | V     | FELMES | DLHQV | VIKA |
| OsMPK21   | 142 | FDHVS  | DATRI | LREIK | LLRLL  | LRHPD    | IVEIK     | HIMLP | PSRRE  | F     | FRDIY | V     | FELMES | DLHQV | VIKA |
| AtMPK15   | 127 | FDHIS  | DATRI | LREIK | LLRLL  | LRHPD    | VVEIK     | HIMLP | PSRRE  | F     | FRDVY | V     | FELMES | DLHQV | VIKA |
| BnaMPK17  | 53  | FEHVS  | DAIRI | LREIK | LLRLL  | LKHPD    | IVEIK     | HIMLP | PCRKE  | F     | KDIYV | V     | FELMES | DLHHV | VLKV |
| AtMPK17   | 53  | FEHVS  | DAIRI | LREIK | LLRLL  | LKHPD    | IVEIK     | HIMLP | PCRKE  | F     | KDIYV | V     | FELMES | DLHHV | VLKV |
| consensus |     | fdn    | idA   | RtLRE | iKLLR  | hrlrHenv | vikdimlpp | rr    | FkDvy  | ivye  | LMd   | TDLh  | qii    | ks    |      |

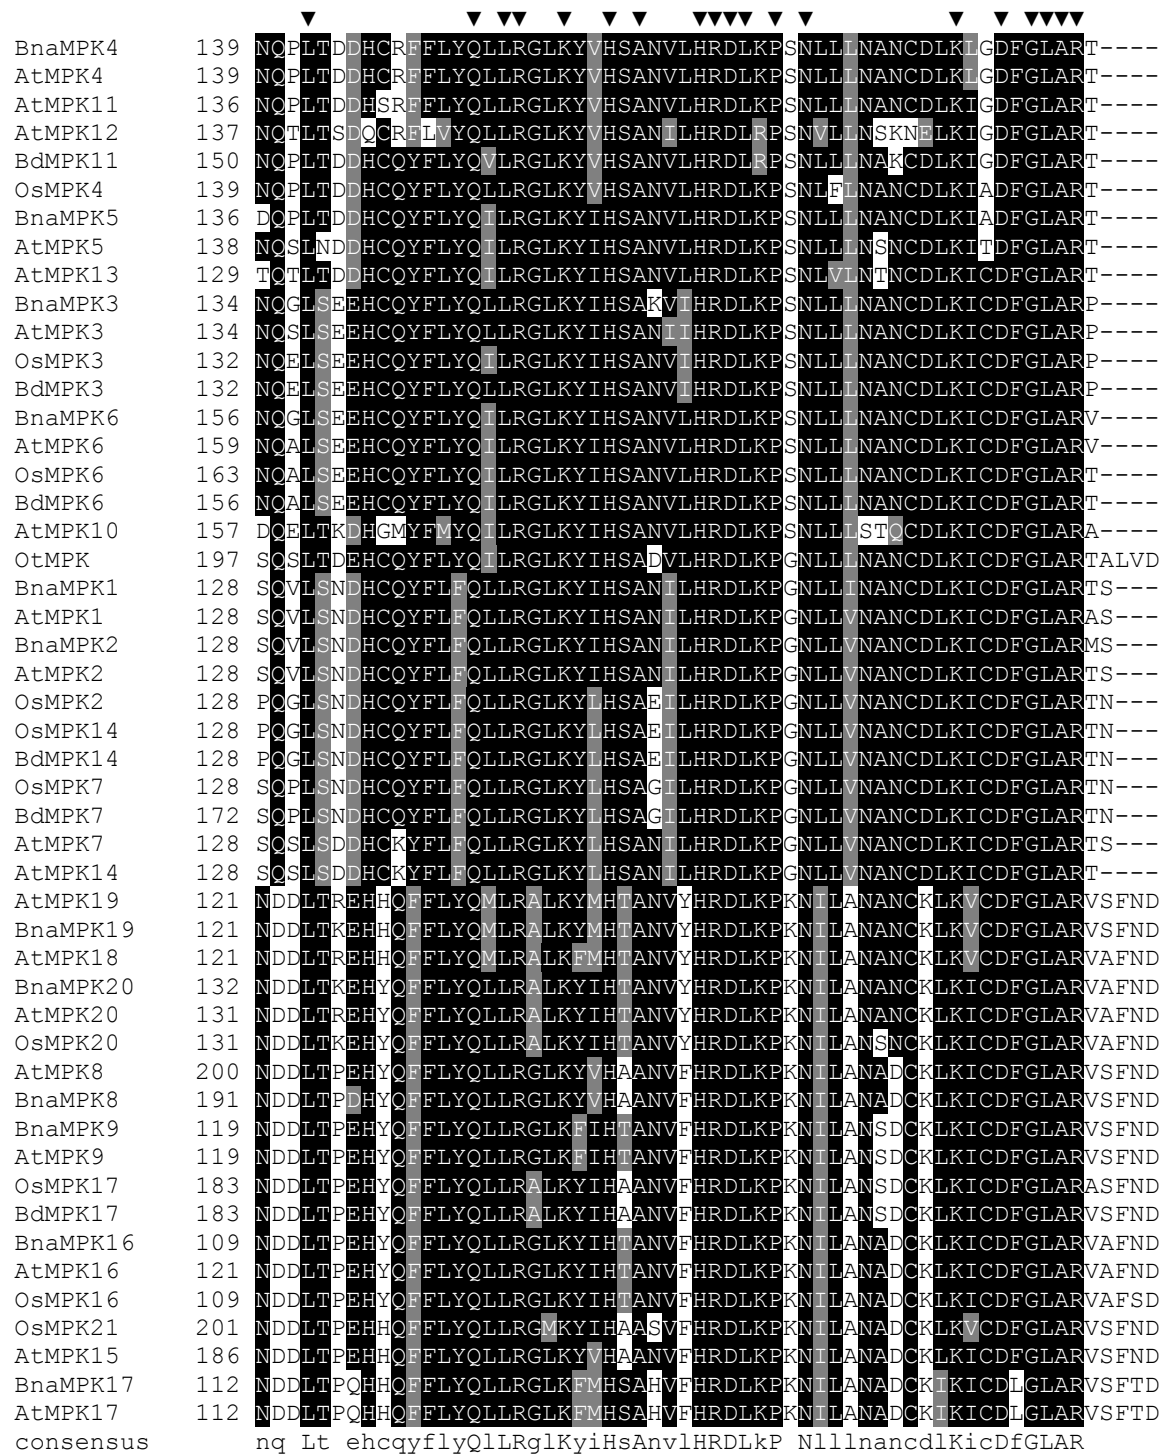

Figure S4. Multiple alignment of MAPK domains of BnaMPKs and selected Arabidopsis, rice, *B. distachyon* and *O. tauri* MAPKs. Alignment was performed using Clustal x1.83 and illustrated with Boxshade. The closed triangles represent highly conserved amino acids.
