# Supplementary material for: Identification and analysis of MKK and MPK gene families in canola (Brassica napus L.)
Source: PubMed Central journal article supplement (PMC3701561; doi:10.1186/1471-2164-14-392), 2013-06-11
Supplement: 1471-2164-14-392-S7.pdf [file 1471-2164-14-392-S7.pdf]

a

Motif

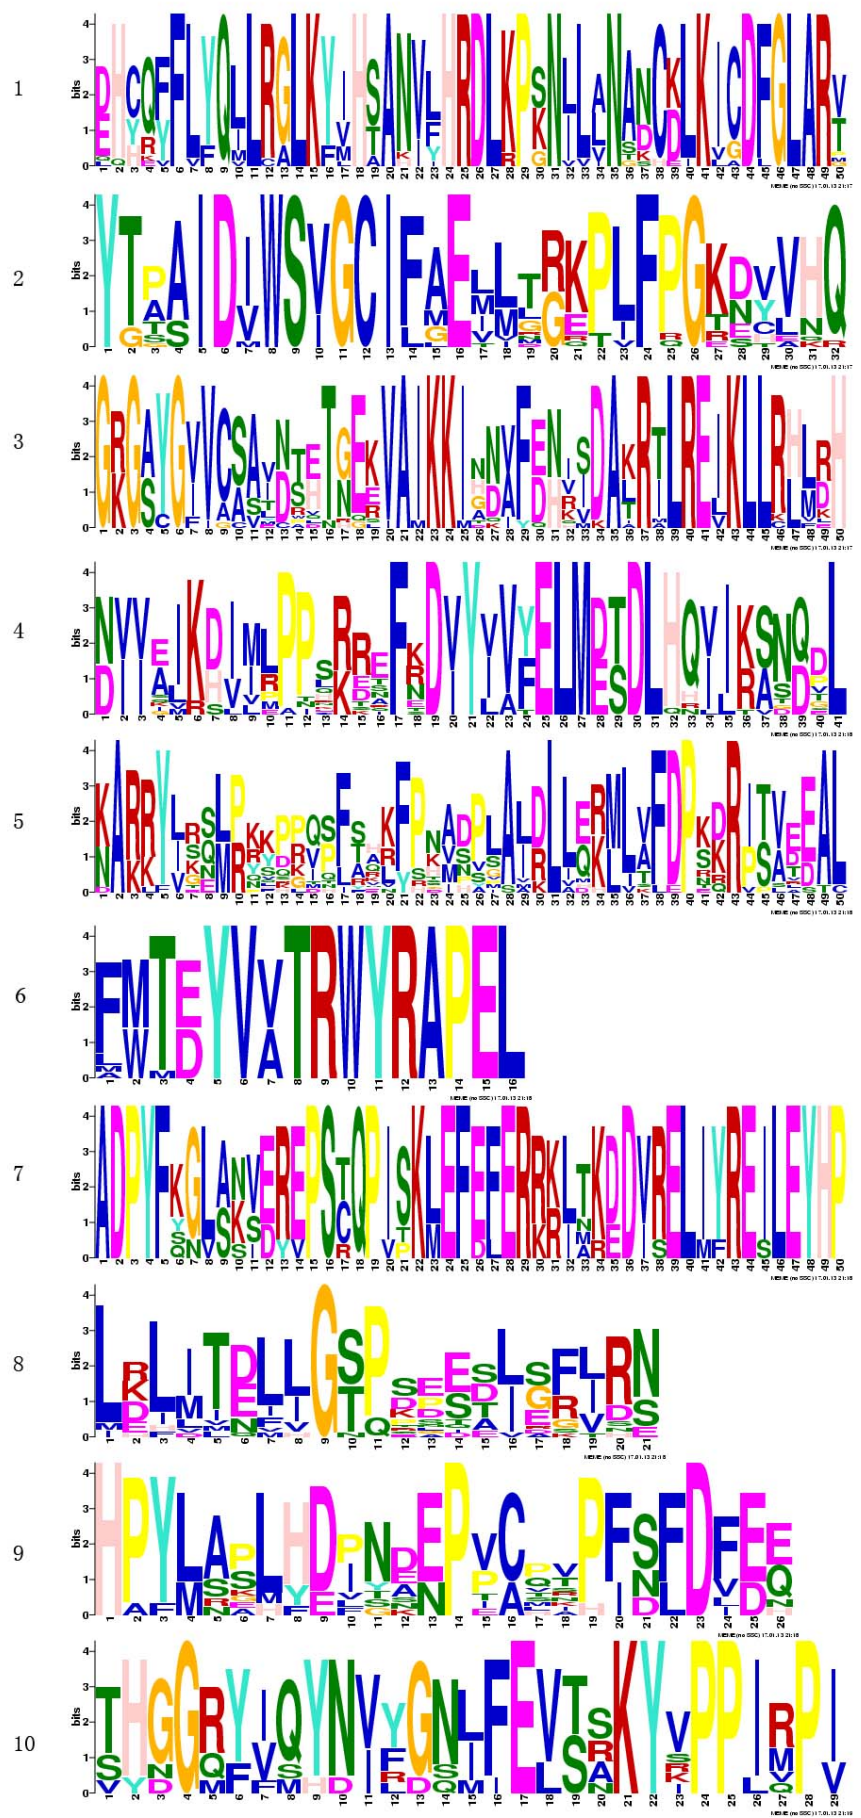

**b**

```

BnaMPK8      1  MGGGGNLVDGVRRLWFQRPSSSSSSNNNNPQEPIKKSDTFSNPDHQSELVITEDLDFSGL
BnaMPK9      1  -----
BnaMPK17     1  -----
BnaMPK16     1  -----
BnaMPK19     1  -----
BnaMPK20     1  -----
BnaMPK1      1  -----MATPVD
BnaMPK2      1  -----MATPVD
BnaMPK3      1  -----MNNAGGQYP
BnaMPK6      1  -----MDGGTGQPAADTEMSEVTGGAAP
BnaMPK4      1  -----MSAENC
BnaMPK5      1  -----MSSETE
consensus    1

```

```

                                     Motif 10                               Motif 3
BnaMPK8      61  KLIKVPKRHLLPMDPQKKGVEKDFFFEYGEAN--RYQVQEVVGKGSYGVVASALDHTHTG
BnaMPK9      1  -----MDPQKQVTLLETEFFFEYGEAS--RYQIQEVIIGKGSYGVVASALDHTHTG
BnaMPK17     1  -----MLEKEFFFEYGEAS--QYQIQEVIIGKGSYGVVASAECPHTG
BnaMPK16     1  -----MQPDQKQKSSVELDFFFEYGEGL--RYRIEEVIIGKGSYGVVCSAYDHTHTG
BnaMPK19     1  -----MQQGQVKKNMKEVDFFFEYGEAN--RYQILEVIIGKGSYGVVCAALDHTHTG
BnaMPK20     1  -----MQQDPQKKNLEMEFFSDYGEAS--REKIQEVIIGKGSYGVVCSALDHTLTG
BnaMPK1      7  P-----PNGVRNQGKHIFT--MQQNLFEIDTKYMP--IKPIGRGAYGVVCSVNTDNN
BnaMPK2      7  P-----PNGVRNQGKHIFS--MQQTLFEIDTKYVP--IKPIGRGAYGVVCSVNTRETN
BnaMPK3      10 -----DFPAVQTHGGQFISYDIFGSLFEVTSKYRPPVPIGRGAYGIVCSVLDSETN
BnaMPK6      24  SQPMPGIENIPATLSHGGMFIQYNIFGNI FEVTAKYSPPIPIGKGYGIVCSAMNSETN
BnaMPK4      7  FGGGGGDQSTKGLATHGGQYVQYNVYGNIFEVTRKYVPLRPIGRGAYGIVCAATNSETG
BnaMPK5      7  S---ATENNIKGVLVHGGRYFQHNVYGNMFEVSNKYVPPPIRPIGRGAYGFVCAAVDSETH
consensus    61  ..*.***.***.***.***.***.***.***.***.***.***.***.***.***.***.***

```

```

                                     Motif 3                               Motif 4
BnaMPK8      119 ERVAIKKINDVFEHVSADATRIILREIKLLRLLRHPDIVEIKHIMLPPSRREFRDIYVVFEL
BnaMPK9      47  EKVAIKKINDVFEHVSADATRIILREIKLLRLLRHPDIVEIKHVMLPPSRREFRDIYVVFEL
BnaMPK17     40  GKVAIKKMTNVFEHVSADATRIILREIKLLRLLRHPDIVEIKHIMLPPCRREFKDIYVVFEL
BnaMPK16     49  EKVAIKKINDVFEHVSADATRIILREIKLLRLLRHPDIVEIKHIMLPPSRREFRDIYVVFEL
BnaMPK19     49  EKVAIKKINDVFEHVSADATRIILREIKLLRLLRHPDIVEIKSIMLPPSRREFKDIYVVFEL
BnaMPK20     50  EKVAIKKIHDVFEHVSADATRIILREIKLLRLLRHPDIVEIKHIMLPPSRREFKDIYVVFEL
BnaMPK1      56  EKVAIKKIHNVEENRIDAALRTLREIKLLRHLRHLRHNVIKDKVMMPIHKRSFKDVYLVYEL
BnaMPK2      56  ERVAIKKIHNVEQNRIDAALRTLREIKLLRHLRHLRHNVIKDKVMMANHKRTFKDVYLVYEL
BnaMPK3      62  ELVAMKKIANAFDNHMDAKRTLREIKLLRHLRHLRHNVIKDKVMMANHKRTFKDVYLVYEL
BnaMPK6      84  ESVAIKKIANAFDNKIDAKRTLREIKLLRHLRHLRHNVIKDKVMMANHKRTFKDVYLVYEL
BnaMPK4      67  EEVAIKKIGNAFDNKIDAKRTLREIKLLRHLRHLRHNVIKDKVMMANHKRTFKDVYLVYEL
BnaMPK5      64  EEVAIKKIGKAFDNKIDAKRTLREIKLLRHLRHLRHNVIKDKVMMANHKRTFKDVYLVYEL
consensus    121 ...*.*.*.*.*.*.*.*.*.*.*.*.*.*.*.*.*.*.*.*.*.*.*.*.*.*.*.*.*

```

```

                                     Motif 4                               Motif 1
BnaMPK8      179  MESDLHQVIKANDDLTPDHYQFFLYQLLRGLKYVHAANVFHRDLKPKNILLANADCKLKIIC
BnaMPK9      107  MESDLHQVIKANDDLTPEHYQFFLYQLLRGLKFIHTANVFHRDLKPKNILLANSDCCLKIIC
BnaMPK17     100  MESDLHHVLKVNDDLTPQHQQFFLYQLLRGLKFMHSAHVHRDLKPKNILLANADCKIKIIC
BnaMPK16     109  MESDLHQVIKANDDLTPEHYQFFLYQLLRGLKYIHTANVFHRDLKPKNILLANADCKLKIIC
BnaMPK19     109  MESDLHQVIKANDDLTKEHHQFFLYQLLRALKYIHTANVYHRDLKPKNILLANANCKLKVIC
BnaMPK20     110  MESDLHQVIKANDDLTKEHYQFFLYQLLRALKYIHTANVYHRDLKPKNILLANANCKLKIIC
BnaMPK1      116  MDTDLHQIIRSNQQLSNDHCQYFLFQLLRGLKYIHSANILHRDLKPKGNLLINANCDLKIIC
BnaMPK2      116  MDTDLHQIIRSNQQLSNDHCQYFLFQLLRGLKYIHSANILHRDLKPKGNLLINANCDLKIIC
BnaMPK3      122  MDTDLHQIIRSNQQLSBEHCQYFLYQLLRGLKYIHSANILHRDLKPKSNLLINANCDLKIIC
BnaMPK6      144  MDTDLHQIIRSNQQLSBEHCQYFLYQLLRGLKYIHSANVLRDLKPKSNLLINANCDLKIIC
BnaMPK4      127  MDTDLHQIIRSNQPLTDDHCRCFFLYQLLRGLKYVHSANVLRDLKPKSNLLINANCDLKIIG
BnaMPK5      124  MDTDLHQIIRSDQPLTDDHCRCFFLYQLLRGLKYIHSANVLRDLKPKSNLLINANCDLKIIGA
consensus    181  *.*.*.*.*.*.*.*.*.*.*.*.*.*.*.*.*.*.*.*.*.*.*.*.*.*.*.*.*

```

|           |     | Motif 1                       | Motif 6                          | Motif 2              |
|-----------|-----|-------------------------------|----------------------------------|----------------------|
| BnaMPK8   | 239 | DFGLARVSFNDAPTAIFWTDYVATRWRAP | ELCGSFFFSKYTPAIDIWSVGCIFAEMILGK  |                      |
| BnaMPK9   | 167 | DFGLARVSFNDAPSAIFWTDYVATRWRAP | ELCGSFFFSKYTPAIDIWSTGICIFAEMLTGK |                      |
| BnaMPK17  | 160 | DFGLARVSFTDSPAIFWTDYVATRWRAP  | ELCGSFFYSNYTPAIDMWSVGCIFAEMLTGK  |                      |
| BnaMPK16  | 169 | DFGLARVAFNDTPTAIFWTDYVATRWRAP | ELCGSFFFSKYTPAIDIWSTGICIFAELLTGK |                      |
| BnaMPK19  | 169 | DFGLARVSFNDTPITVFWTDYVATRWRAP | ELCGSFFCSKYTPAIDIWSTGICIFAELLGK  |                      |
| BnaMPK20  | 170 | DFGLARVAFNDTPITVFWTDYVATRWRAP | ELCGSFFYSKYTPAIDIWSTGICIFAELVMGK |                      |
| BnaMPK1   | 176 | DFGLARTSN---TKCQLMTEYVVTRWRAP | ELL-LCCDNYGTSIDVWSVGCIFAELLGRK   |                      |
| BnaMPK2   | 176 | DFGLARMSN---TKCQFMTEYVVTRWRAP | ELL-LCCDNYGTSIDVWSVGCIFAELLGRK   |                      |
| BnaMPK3   | 182 | DFGLARPT---SENEFMTEYVVTRWRAP  | ELL-LNSSDYTA AIDVWSVGCIFMELMNRK  |                      |
| BnaMPK6   | 204 | DFGLARVN---SESEFMTEYVVTRWRAP  | ELL-LNSSDYTA AIDVWSVGCIFMELMDRK  |                      |
| BnaMPK4   | 187 | DFGLARTK---SETDFMTEYVVTRWRAP  | ELL-LNCSEYTA AIDIWSVGCILGETMTRE  |                      |
| BnaMPK5   | 184 | DFGLARTT---SETDLMTEYVVTRWRAP  | ELL-LNSSEYTS AIDVWSVGCIFAELMTRE  |                      |
| consensus | 241 | *.****. . . . .               | * ** ***** . . . . .             | * . . . ** * . . . . |

|           |     | Motif 2                   | Motif 8                     | Motif 5             |
|-----------|-----|---------------------------|-----------------------------|---------------------|
| BnaMPK8   | 299 | PLFPGEDVVHQLDHTDFHGNPPPE  | ESISRIRNEKARRYLSMRKQHPDSFYH | KFKADPL             |
| BnaMPK9   | 227 | PLFPGKNVVHQLDHTDMLGTPSPE  | AISRIRNEKARRYLGNMRRKPPVPTH  | KFPVDP              |
| BnaMPK17  | 220 | PLFPGKNVVHQLDHTDLLGTPSPIT | LSRIRNEKARKYLSNMRRKDPVPTH   | KFPNIDPV            |
| BnaMPK16  | 229 | PLFPGKNVVHQLDHTDMLGTPSAE  | ATGRVNEKARRYLSMRKKKPIPF     | SHKFPHADPL          |
| BnaMPK19  | 229 | PLFPGKSVVHQLDHTDMLGTPKSE  | TIAGVRNEKARKYLGEMRKKSLV     | PFTQKFPNADPS        |
| BnaMPK20  | 230 | PLFPGKNVVHQLDHTDMLGTPSLD  | TISRVRNEKARRYLSMRKKKPIPF    | TQKFPNADPL          |
| BnaMPK1   | 232 | PIFQGTCLNQLKLIIVNILGSQR   | DELEFIDNPKAKRYIRSLPYS       | PGMSLSRLYPGAHV      |
| BnaMPK2   | 232 | PIFPGTECLNQLKLIINILGSQK   | EDELEFIDNPKAKRYIESLPYS      | PGMSLSRLYPNANV      |
| BnaMPK3   | 237 | PLFPGKDHVHQLRLITELIGTP    | TESDLGFTHNEAKRYIRQLPN       | FPRQLAKLFSHVNP      |
| BnaMPK6   | 259 | PLFPGRDHVHQLRLITELIGTP    | SEQEVFN-ENAKRYIRQLPPY       | PRQSIDKFPNVHPL      |
| BnaMPK4   | 242 | PLFPGKDYVHQLRLITELIGSP    | DDSSLGFIRSENARRYVKQL        | PQYPRQNF AARFPNMSAG |
| BnaMPK5   | 239 | PLFPGKDYVHQLRLITELIGSP    | DGTSLEFIRSENARKYVKEL        | PKLPRQSF AARFPMSSSI |
| consensus | 301 | *.*.*. . . . *            | . . . . . * . . . . .       | * . . . . * . . . . |

|           |     | Motif 5             | Motif 9               | Motif 7               |
|-----------|-----|---------------------|-----------------------|-----------------------|
| BnaMPK8   | 359 | ALRLLERLITFDPKDRVSA | ADDALADPYFSGLSNS      | ERV PSTQPI SKLEFDLERK |
| BnaMPK9   | 287 | ALRLLHRLIAFDPKDRPTA | EALADPYFYGLANVD       | REPSTQPIPKLEFEFERRK   |
| BnaMPK17  | 280 | ALKLLQHLVAFDPKDRPSA | EALADPYFQGLANVD       | YEPSRQPI SKLEFEFERRK  |
| BnaMPK16  | 289 | ALRLLKMLSFDPKDRPTSE | EALADPYFKNLAKVERE     | PSCQPVTKLEFEFERRIT    |
| BnaMPK19  | 289 | ALRLLQRLIAFDPKDRPTA | EALADPYFKGLAKVERE     | PSCQPI SKMEFEFERRL    |
| BnaMPK20  | 290 | SLKLLERLIAFDPKDRP   | -PLRSTCDPYFKDCESG     | EG-ASCQPIR-DEFEFERRK  |
| BnaMPK1   | 292 | AIDLQKMLVDFPSKRISV  | TEALQHPYMAPLYDPNAN    | PPAQQVPIDLDVDEEEL     |
| BnaMPK2   | 292 | AIDLQKMLVDFPSKRISV  | VEALQHPYMAPLYDPNAN    | PPAQQVPIDLDVDEEED     |
| BnaMPK3   | 297 | AIDLVDRLTFDPNKRITV  | EEALNHPYLAKLHDPN      | DEPICLPKPFSDFEQ       |
| BnaMPK6   | 318 | AIDLIEKMLTFDPRRITV  | LDALAHPYLNSLHDIS      | DEPECTIPFNDFEQ        |
| BnaMPK4   | 302 | AADLLEKMLVDFPSRRITV | DEALCHPYLAPLHDIN      | EEPVCVRPFNFDFEQ       |
| BnaMPK5   | 299 | AIDLLEKMLVDFPEKRITV | EEALCHPFLSALHDIN      | DEPVCNSHFSDFEN        |
| consensus | 361 | ...* . . . . *      | . . . . . * . . . . . | . . . . . * . . . . . |

|           |     | Motif 7               |
|-----------|-----|-----------------------|
| BnaMPK8   | 419 | SELIFREILEYHPQMMQ     |
| BnaMPK9   | 347 | RELIYREILEYHPRMQ      |
| BnaMPK17  | 340 | RELMYREILEYHPRMQ      |
| BnaMPK16  | 349 | RELIYRESLEYHPKML      |
| BnaMPK19  | 349 | RELIYREILEYHPQLL      |
| BnaMPK20  | 347 | RELISREILEYHPQLL      |
| BnaMPK1   | 349 | REMMWNEMLHYHPQ        |
| BnaMPK2   | 351 | RELMWEEVMHYHPET       |
| BnaMPK3   | 355 | KEMIYREAIALNP         |
| BnaMPK6   | 376 | KELIYREALAFNPE        |
| BnaMPK4   | 360 | KELIYRETVKFN          |
| BnaMPK5   | 357 | KELVWLESVKFN          |
| consensus | 421 | * . . . . * . . . . * |

```

BnaMPK8      477 RSTAMHRHHASLPRERVPAQSGETAEESS-----
BnaMPK9      399 RSAPLQQRHASLPRERVPAPKEENRPAAT-----
BnaMPK17     396 NSPPIQRKYTSLPRERVCSSEDEGGDSVH-----
BnaMPK16     402 HNPPEQQHASLPRACVLYSDNNHAAAQSSVEVTDGLSKCSIRDTERPRGADRRVPINV
BnaMPK19     401 PIIPPERKHASLPRSTVHPGVVTTSSNAQPPESRRHVSFDPSRNVVPSTSTKPLGPPPRIP
BnaMPK20     399 PVAPLERKHASLPRSTVIHSTGVARGGQPKLMNSTNTLNPETTRNIPLNHATLQAQQRN
BnaMPK1      -----
BnaMPK2      -----
BnaMPK3      -----
BnaMPK6      -----
BnaMPK4      -----
BnaMPK5      -----
consensus    481      . . . . .

BnaMPK8      506 -----DVERR-----AAAVASTLESEEEAD-
BnaMPK9      428 -----LATTP-----ESPQSSQHEGSNYMNG
BnaMPK17     425 -----AQLPS-----SSVFTPPQTPNTETG
BnaMPK16     462 PQTIQGAAVAR-----PGKVVGSVLRYNNCGA
BnaMPK19     461 SGRPGRAVESSSLTYENNRNLKESSYDARTSYYRTTPQQNTVSPNCFNPNTTMNQEKR
BnaMPK20     459 LSAAKPSAFMG--PVAPFDNGRSSRDAYDPRSFIRSTTTSLPFQQSASTAAMGKQQERR
BnaMPK1      -----
BnaMPK2      -----
BnaMPK3      -----
BnaMPK6      -----
BnaMPK4      -----
BnaMPK5      -----
consensus    541

BnaMPK8      526 -NGGGYSARSLMKS-----SSISGSKCIGVQSKTDKEDTIAEEGDGESVSAELT
BnaMPK9      449 MSQTGYSARSLLKS-----ASISASKCIGVKQRNQSE---HGESNSDATDALS
BnaMPK17     446 LSSKKTAQVDKAAA-----TPVKRSACLVR-----SDSICASRCV
BnaMPK16     489 ATGVEAIEQQRRM-----VRNPAGAAQYPKRTPQCKSNRGDEDSEGSSRLK
BnaMPK19     521 LGTEAAASQSKPQF-----VPTQCNSAKPAELNPNYVQQTQHKVGIDAKLLH
BnaMPK20     517 TTTTMESEKQARQISQYNIYAQPDVAINIDNNPFIMARTGMHKAENMSDHRIIIDTNLLQ
BnaMPK1      -----
BnaMPK2      -----
BnaMPK3      -----
BnaMPK6      -----
BnaMPK4      -----
BnaMPK5      -----
consensus    601

BnaMPK8      573 DRV-ASLRNS-----
BnaMPK9      494 QKA-AALHT-----
BnaMPK17     481 GVS-SAVS-----
BnaMPK16     537 QNP-QYIPQKVGGAQDTATSRWY-----
BnaMPK19     569 AQS-QYGPAGAAAVAVAAHRSVGTVGYGMS---
BnaMPK20     577 ATAGIGVAAAAAAAPGGSAHRKVGGVRYGMSKMY
BnaMPK1      -----
BnaMPK2      -----
BnaMPK3      -----
BnaMPK6      -----
BnaMPK4      -----
BnaMPK5      -----
consensus    661

```

Figure S5. A detailed motif analysis and multiple alignment of canola MPKs.

a, The analysis is from MEME 4.9.0 (Release date: Wed Oct 3 11:07:26 EST 2012).

Stack heights represent conservation at a position, and symbol heights within a stack represent the relative frequency of each residue.

b, Multiple alignment of BnaMPKs with 10 motifs shown as overbars.
